# Supplementary material
Source: Springer Nature journal article supplement (https://www.springermedizin.de/resource/supplementary/13049_2012_501_MOESM1_ESM.pdf/9666578)

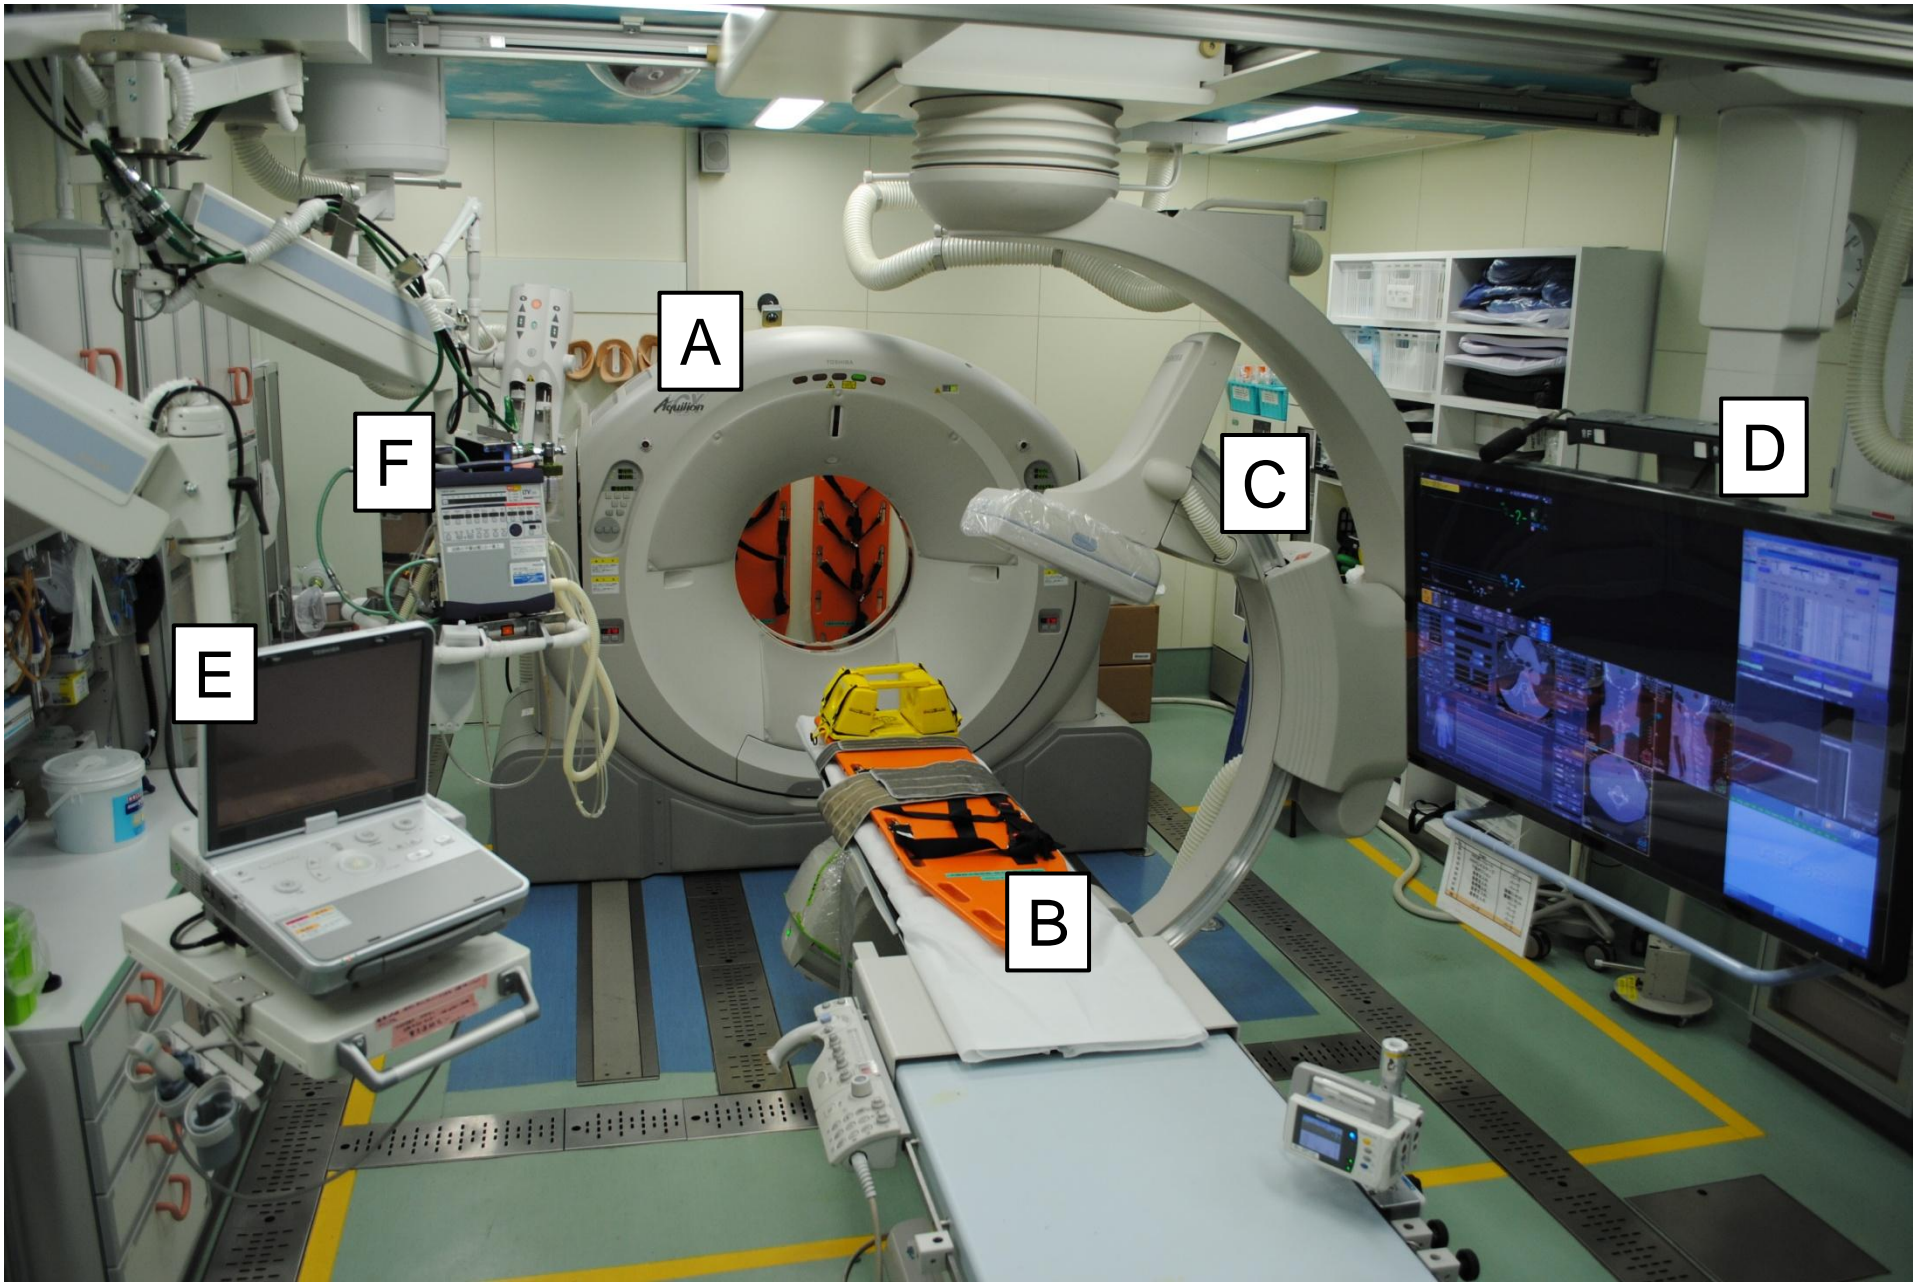

A

F

E

B

C

D

Supplement: MOESM1 [file 9666578]
